# Supplementary material
Source: Research Square preprint supplement (doi:10.21203/rs.3.rs-8760492/v1)
Supplement: Supplementary file 1 [file 60bda29cdef7f0860444bc36.docx]

**Supplementary File 1**

**Questionnaire Used to Assess Determinants of Newborn Metabolic Screening Uptake**

**This questionnaire was developed by the authors to assess socioeconomic, educational, and healthcare-related determinants of newborn metabolic screening uptake. The original questionnaire was developed in Persian and translated into English for publication purposes.**

**Identification Information**

- Name of respondent: __________
- Name of screening center: __________
- Health network:
  ☐ Rey  ☐ Eslamshahr  ☐ South Tehran

**Socio-demographic Characteristics**

1. Father’s age: ___ years
2. Mother’s age: ___ years
3. Mother’s level of education:
   ☐ Illiterate
   ☐ Primary school
   ☐ Middle school
   ☐ High school diploma
   ☐ University education
   ☐ Religious (seminary) education
4. Father’s level of education:
   ☐ Illiterate
   ☐ Primary school
   ☐ Middle school
   ☐ High school diploma
   ☐ University education
   ☐ Religious (seminary) education
5. Father’s employment status:
   ☐ Self-employed
   ☐ Employed (government or private sector)
   ☐ Unemployed
6. Mother’s employment status:
   ☐ Homemaker
   ☐ Employed
   ☐ Self-employed
7. Household size: ___ persons
8. Number of children:
   ☐ 1
   ☐ 2
   ☐ 3
   ☐ 4 or more
9. Nationality:
   ☐ Iranian
   ☐ Non-Iranian
10. Monthly household income:
    ☐ Less than 10 million IRR
    ☐ 10–20 million IRR
    ☐ 20–30 million IRR
    ☐ More than 30 million IRR
11. Housing status:
    ☐ Owner-occupied
    ☐ Rented
    ☐ Employer-provided (organizational housing)
    ☐ Free of charge

**Insurance and Household Assets**

1. Type of basic health insurance:
   ☐ Social Security
   ☐ Armed Forces Insurance
   ☐ Iranian Health Insurance
   ☐ Relief Committee (Imam Khomeini Relief Foundation)
   ☐ Other
   ☐ No insurance
2. Do you have supplementary (private) health insurance?
   ☐ Yes
   ☐ No
3. Please indicate which of the following are available in your household:
   ☐ Laptop
   ☐ Smartphone
   ☐ Mobile internet access
   ☐ Home internet access

**Prenatal Education on Newborn Metabolic Screening**

1. During the first trimester of pregnancy, did you receive any education about newborn metabolic screening?
   ☐ Yes
   ☐ No
2. If yes, from whom?
   ☐ Health center staff
   ☐ Obstetrician/gynecologist
   ☐ Friends or relatives
   ☐ Media or social networks
3. During the third trimester of pregnancy, did you receive any education about newborn metabolic screening?
   ☐ Yes
   ☐ No
4. If yes, from whom?
   ☐ Health center staff
   ☐ Physician
   ☐ Private healthcare centers
   ☐ Friends or relatives
   ☐ Media or social networks
5. Was the information provided sufficient to make a decision about newborn metabolic screening?
   ☐ Yes
   ☐ No
6. If no, which information required further explanation?

**Perceptions, Barriers, and Access**

1. In your opinion, how important is newborn metabolic screening for your child’s health?
   ☐ Very important
   ☐ Moderately important
   ☐ Slightly important
   ☐ Not important
2. Given the importance of newborn metabolic screening, are you willing to have it performed at a public health center?
   ☐ Yes
   ☐ No
3. If no, what is the main reason?
   ☐ Financial concerns
   ☐ Lack of trust in public healthcare services
   ☐ Insufficient awareness about newborn metabolic screening
   ☐ Fear of possible test results
   ☐ Other (please specify): ____________________________
4. In your opinion, what is the main purpose of newborn metabolic screening?
   ☐ Prevention of serious diseases
   ☐ Prevention of disease complications
   ☐ I do not know
5. How difficult is it for you to afford the cost of newborn metabolic screening?
   ☐ Very difficult
   ☐ Moderately difficult
   ☐ Slightly difficult
   ☐ No financial difficulty
6. To what extent do you trust the accuracy and quality of newborn screening services provided by public health centers?
   ☐ Very high
   ☐ High
   ☐ Moderate
   ☐ Low
   ☐ None
7. Do you think traditional beliefs can influence participation in newborn screening programs?
   ☐ Yes
   ☐ No
8. Walking distance from your home to the nearest screening center:
   ☐ Less than 15 minutes
   ☐ 15–30 minutes
   ☐ More than 30 minutes
9. Main mode of transportation to the screening center:
   ☐ Private vehicle
   ☐ Public transportation
   ☐ Online taxi services
   ☐ Walking
10. In your opinion, what measures could increase family participation in newborn metabolic screening programs?
    *(e.g., better education, lower costs, improved access)*
